# Supplementary figures and images for: Synthesis, nucleic acid binding, anticancer and antimicrobial activities of polymer–copper(ii) complexes containing intercalative phenanthroline ligand(DPQ)
Source: Royal Society of Chemistry journal article supplement (doi:10.1039/c3ra42512f), 2013-01-01

## supplementary section

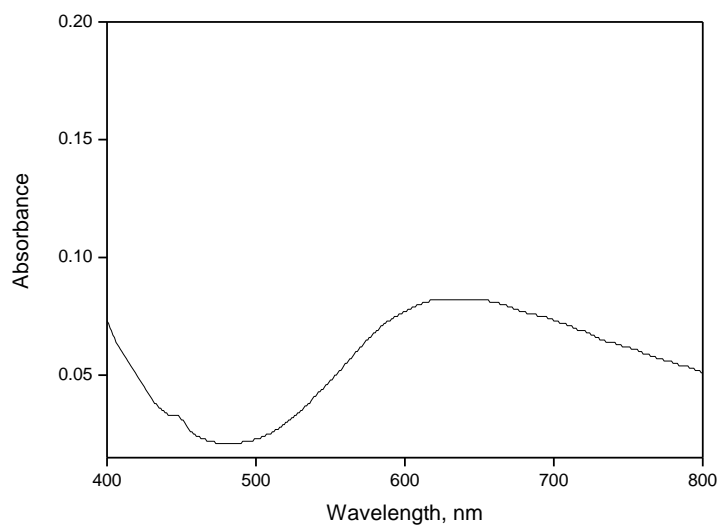

Supplement: c3ra42512f.pdf [file c3ra42512f.pdf]
